# Supplementary material for: Long-term safety and efficacy of renal sympathetic denervation in atrial fibrillation: 3-year results of the AFFORD study
Source: PubMed Central journal article supplement (PMC10697905; doi:10.1007/s00392-023-02222-3), 2023-05-25
Supplement: 392_2023_2222_MOESM1_ESM.pdf [file 392_2023_2222_MOESM1_ESM.pdf]

## **Supplemental Material**

**Supplemental Table 1. Antiarrhythmic drug burden over time**

|                                                                                        | <b>Baseline</b> | <b>6 months</b> | <b>1 year</b> | <b>2 years</b> | <b>3 years</b> | <b>Annual change (95% CI)</b> | <b>P-value</b> |
|----------------------------------------------------------------------------------------|-----------------|-----------------|---------------|----------------|----------------|-------------------------------|----------------|
|                                                                                        | <b>(N=20)</b>   | <b>(N=20)</b>   | <b>(N=20)</b> | <b>(N=20)</b>  | <b>(N=19)</b>  |                               |                |
| <b>Antiarrhythmic drug summary measures</b>                                            |                 |                 |               |                |                |                               |                |
| Number of DDDs, median [25 <sup>th</sup> -75 <sup>th</sup> percentile]                 | 1.0 [0.5-1.3]   | 1.0 [0.5-1.1]   | 0.8 [0.5-1.0] | 0.9 [0.3-1.0]  | 0.5 [0.3-1.0]  | -12.5% (-28.4%, 6.9%)         | 0.19           |
| Number of antiarrhythmic drugs, median [25 <sup>th</sup> -75 <sup>th</sup> percentile] | 1 [1.0-1.3]     | 1.0 [1.0-1.0]   | 1.0 [1.0-1.0] | 1.0 [1.0-1.0]  | 1.0 [1.0-1.0]  | -7.2% (-21.6%, 9.9%)          | 0.39           |
| <b>Individual classes of antiarrhythmic drugs</b>                                      |                 |                 |               |                |                |                               |                |
| Class I, n (%)                                                                         | 3 (15.0)        | 3 (15.0)        | 3 (15.0)      | 3 (15.0)       | 1 (5.3)        |                               |                |
| Class II, n (%)                                                                        | 6 (30.0)        | 5 (25.0)        | 5 (25.0)      | 6 (30.0)       | 6 (31.6)       |                               |                |
| Class III, n (%)                                                                       | 13 (65.0)       | 12 (60.0)       | 13 (65.0)     | 9 (45.0)       | 9 (47.4)       |                               |                |
| Class IV, n (%)                                                                        | 0 (0.0)         | 0 (0.0)         | 0 (0.0)       | 0 (0.0)        | 0 (0.0)        |                               |                |
| Glycosides, n (%)                                                                      | 2 (10.0)        | 2 (10.0)        | 2 (10.0)      | 2 (10.0)       | 2 (10.5)       |                               |                |

CI, Confidence Interval. DDD, Defined Daily Dosage.
